# Supplementary material for: Direct synthesis of core–shell MFI zeolites with spatially tapered trimodal mesopores via controlled orthogonal self-assembly
Source: Royal Society of Chemistry journal article supplement (doi:10.1039/c9nr01497g), 2019-01-01
Supplement: c9nr01497g1.pdf [file c9nr01497g1.pdf]

Supporting Information

**Direct Synthesis of Core-shell MFI Zeolite with Spatially Tapered Trimodal Mesopores via Controlled Orthogonal Self-Assembly**

*Zhuwen Chen,<sup>a,b‡</sup> Lei Dong,<sup>a‡</sup> Chao Chen,<sup>a</sup> Yanding Wang,<sup>a</sup> Ya Wang,<sup>a</sup> Jian Zhang,<sup>a</sup> Wei Qian,<sup>a</sup> Mei Hong<sup>a\*</sup>*

<sup>a</sup>Guangdong Provincial Key Laboratory of Nano-Micro Materials Research, School of Chemical Biology & Biotechnology, Peking University Shenzhen Graduate School, Shenzhen 518055, China.

<sup>b</sup>College of Chemistry and Environmental Engineering, Shenzhen University, Shenzhen 518060, PR China

E-mail: [hongmei@pkusz.edu.cn](mailto:hongmei@pkusz.edu.cn)

KEYWORDS: Core-shell zeolites, trimodal mesopores, MFI, organosilane, orthogonal self-assembly

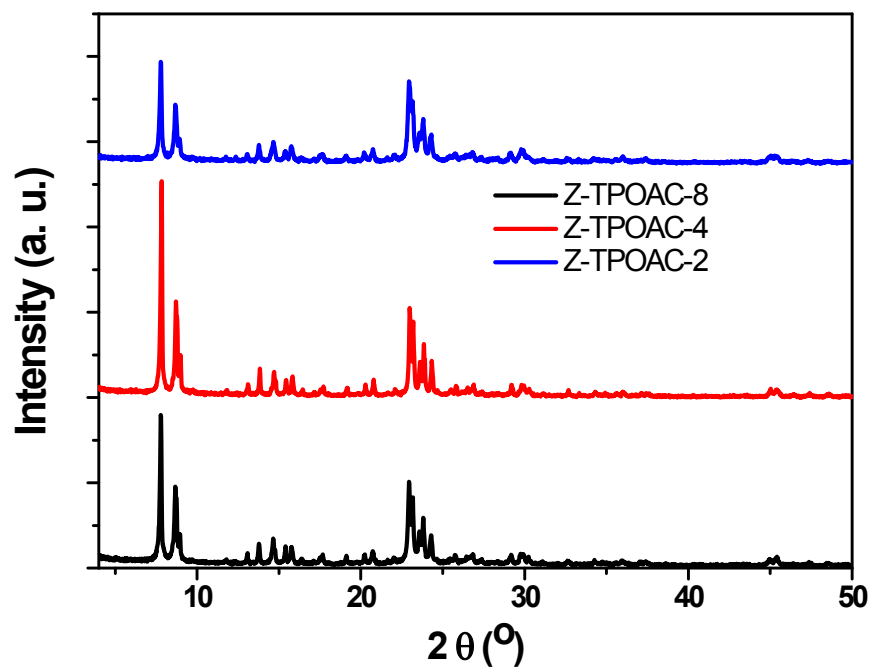

**Figure S1.** XRD patterns of different Z-TPOAC-n samples.

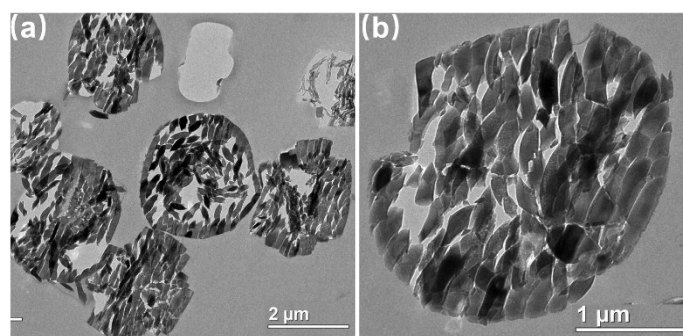

**Figure S2.** TEM images of commercially available bulk ZSM-5 zeolite crystals with no discernable mesopores taken at different magnification.

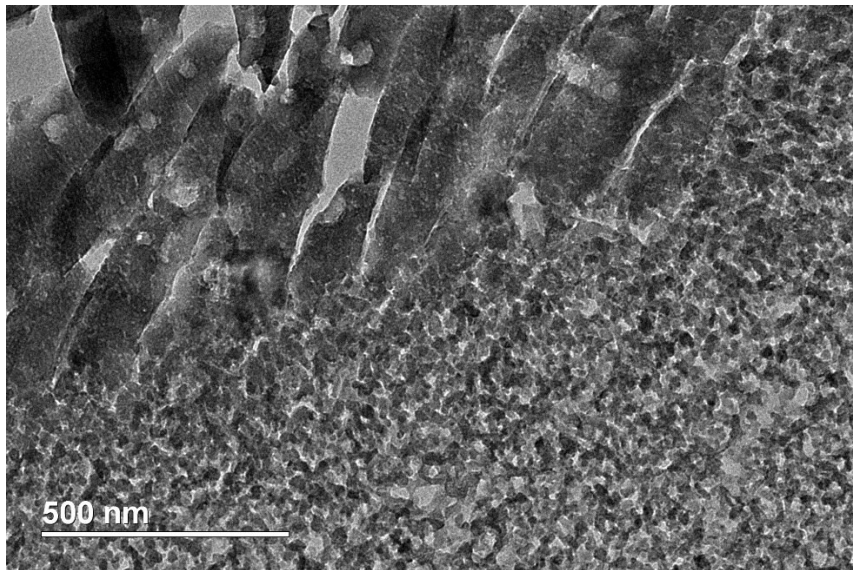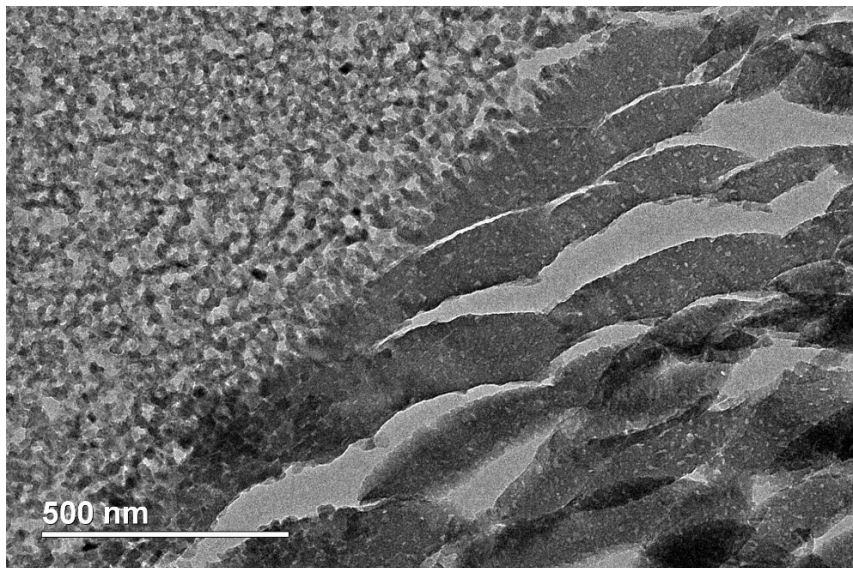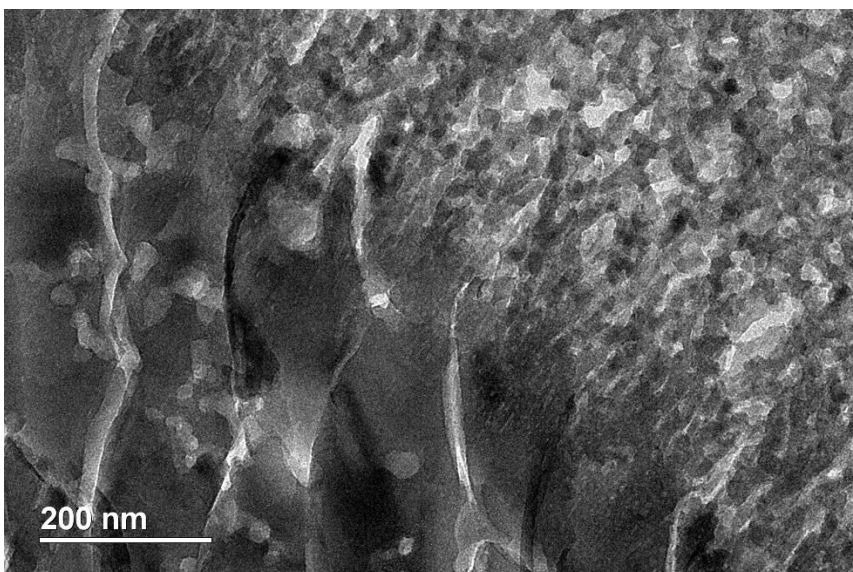

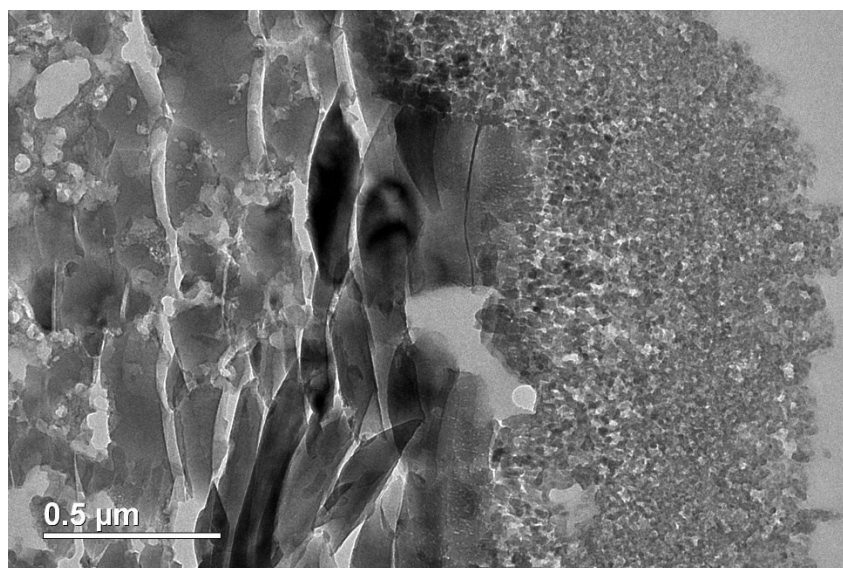

**Figure S3.** TEM images of Z-TPOAC-8 showing the mesopore distribution in the core-shell structure.

**Table S1.** Textural properties of as-made samples.

| Sample    | Surface Area (m <sup>2</sup> / g) |                                 |                               | Pore Volume (cm <sup>3</sup> / g) |                                 |                                |
|-----------|-----------------------------------|---------------------------------|-------------------------------|-----------------------------------|---------------------------------|--------------------------------|
|           | S <sub>total</sub> <sup>a</sup>   | S <sub>micro</sub> <sup>b</sup> | S <sub>ext</sub> <sup>c</sup> | V <sub>total</sub> <sup>d</sup>   | V <sub>micro</sub> <sup>e</sup> | V <sub>meso</sub> <sup>f</sup> |
| Z-Bulk    | 329                               | 218                             | 111                           | 0.19                              | 0.12                            | 0.07                           |
| Z-TPOAC-8 | 407                               | 206                             | 201                           | 0.62                              | 0.11                            | 0.51                           |
| Z-TPOAC-4 | 370                               | 227                             | 143                           | 0.34                              | 0.12                            | 0.22                           |
| Z-TPOAC-2 | 361                               | 233                             | 128                           | 0.32                              | 0.12                            | 0.20                           |

<sup>a</sup>BET surface area.<sup>b</sup>t-Plot micropore surface area.<sup>c</sup>t-Plot external surface area.<sup>d</sup>Total pore volume of pores calculated at  $P/P_0 = 0.98$ <sup>e</sup>t-Plot micropore volume.<sup>f</sup>V<sub>meso</sub> = V<sub>total</sub> - V<sub>micro</sub>**Table S2.** Local minimums in the trimodal mesopore distribution of the core-shell Z-TPOAC-n zeolites.

| Sample    | Local Minimums |             |            |
|-----------|----------------|-------------|------------|
|           | First (nm)     | Second (nm) | Third (nm) |
| Z-TPOAC-8 | 3.2            | 5.1         | 11.3       |
| Z-TPOAC-4 | 2.6            | 5.1         | 13.7       |
| Z-TPOAC-2 | 2.6            | 5.1         | 15         |

**Table S3.** Trimodal mesopore size and volume distribution of the core-shell Z-TPOAC-n zeolites.

| Sample    | First mesopores (2.6-5.0 nm) |                             |                       | Second mesopores (5.0-14.5 nm) |                             |                       | Third mesopores (>14.5 nm) |                             |                       |
|-----------|------------------------------|-----------------------------|-----------------------|--------------------------------|-----------------------------|-----------------------|----------------------------|-----------------------------|-----------------------|
|           | Peak (nm)                    | Volume (cm <sup>3</sup> /g) | Volume percentage (%) | Peak (nm)                      | Volume (cm <sup>3</sup> /g) | Volume percentage (%) | Peak (nm)                  | Volume (cm <sup>3</sup> /g) | Volume percentage (%) |
| Z-TPOAC-8 | 4.0                          | 0.0395                      | 7.80                  | 6.7                            | 0.1564                      | 30.89                 | 32                         | 0.3104                      | 61.31                 |
| Z-TPOAC-4 | 4.0                          | 0.0443                      | 20.28                 | 9.0                            | 0.08                        | 36.61                 | 25                         | 0.0942                      | 43.11                 |
| Z-TPOAC-2 | 4.0                          | 0.0635                      | 33.63                 | 12                             | 0.0448                      | 23.73                 | 23                         | 0.0805                      | 42.64                 |

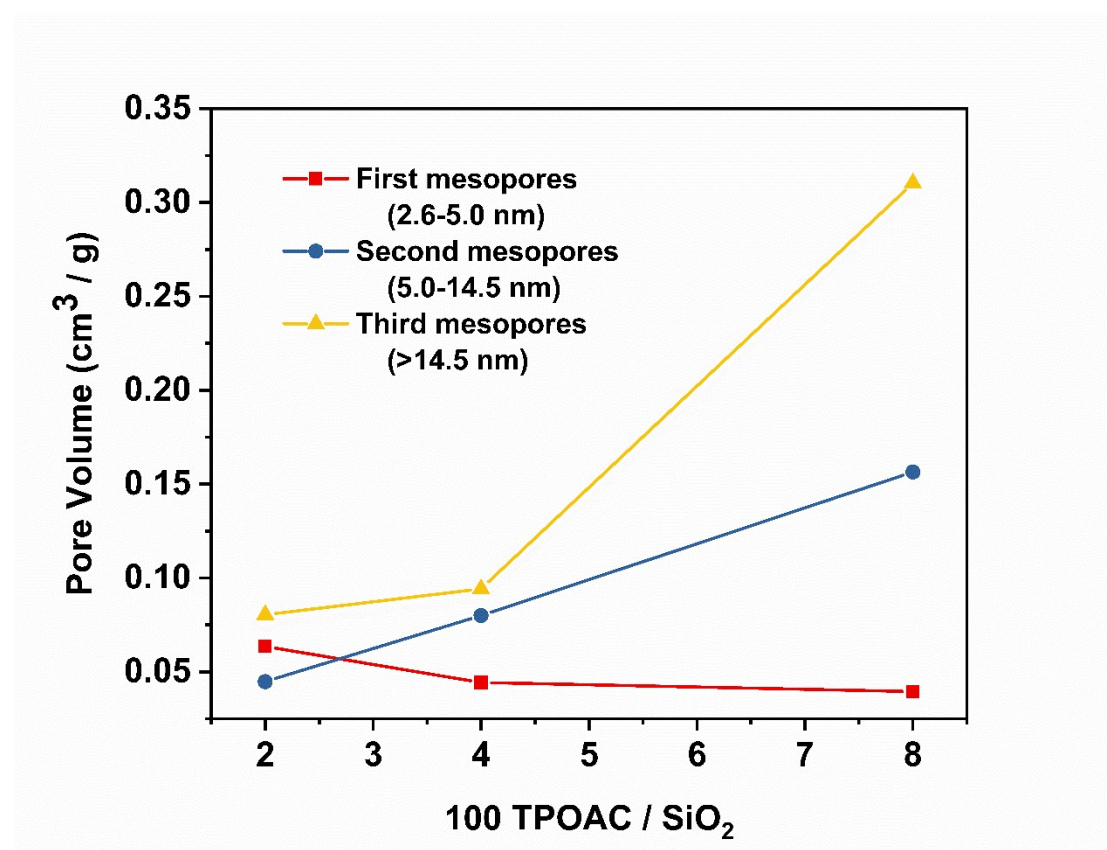

**Figure S4.** Variation of the mesopore pore volume in the trimodal mesopore pore range of 2.6-5.0 nm, 5.0-14.5 nm and >14.5 nm as a function of the amount of TPOAC added in the zeolite synthesis system.

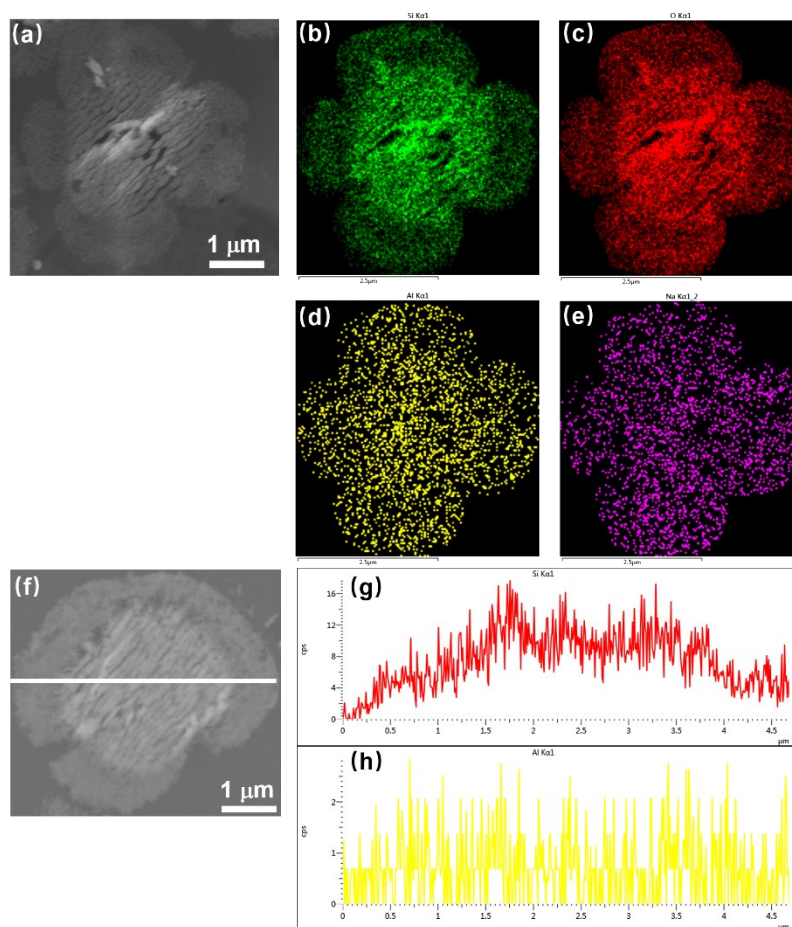

**Figure S5.** SEM-EDX elemental analysis of core-shell dual-structure Z-TPOAC-8 zeolite, (a) SEM image used for EDX-mapping, (b-e) element distribution of (b) Si, (c) O, (d) Al, (e) Na. (f) SEM-EDX line-scanning of (g) Si and (h) Al.



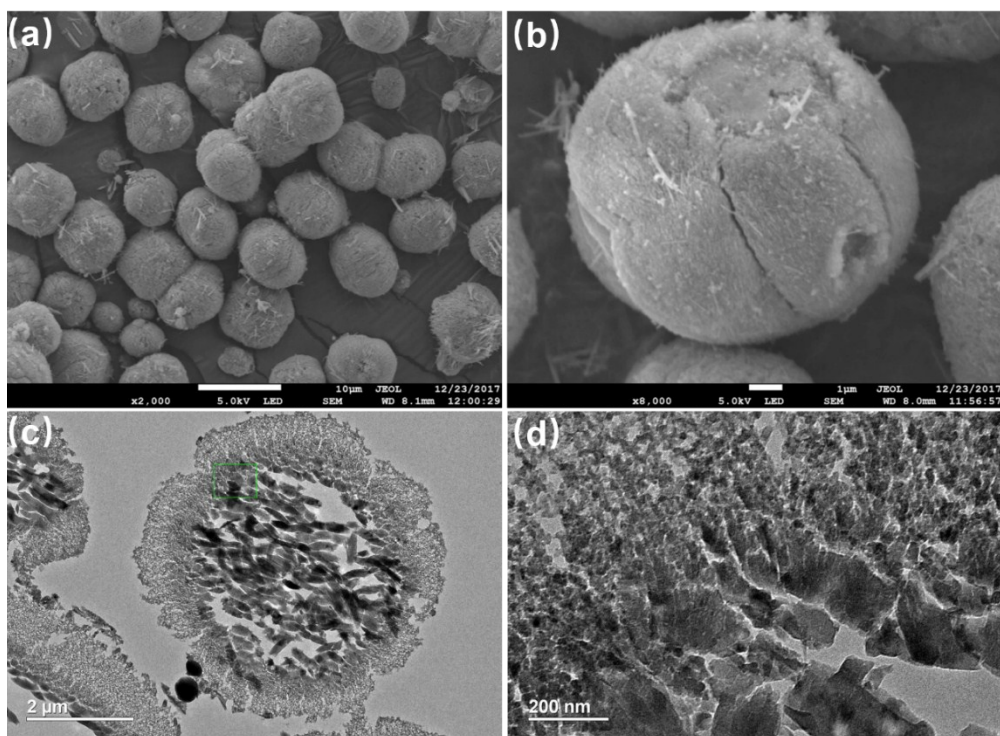

**Figure S6.** (a,b) SEM images, (c) low-resolution TEM images of core-shell dual-structure Z-TPOAC-4 sample, (d) magnified TEM image of marked area in (c) showing the core-shell boundary.

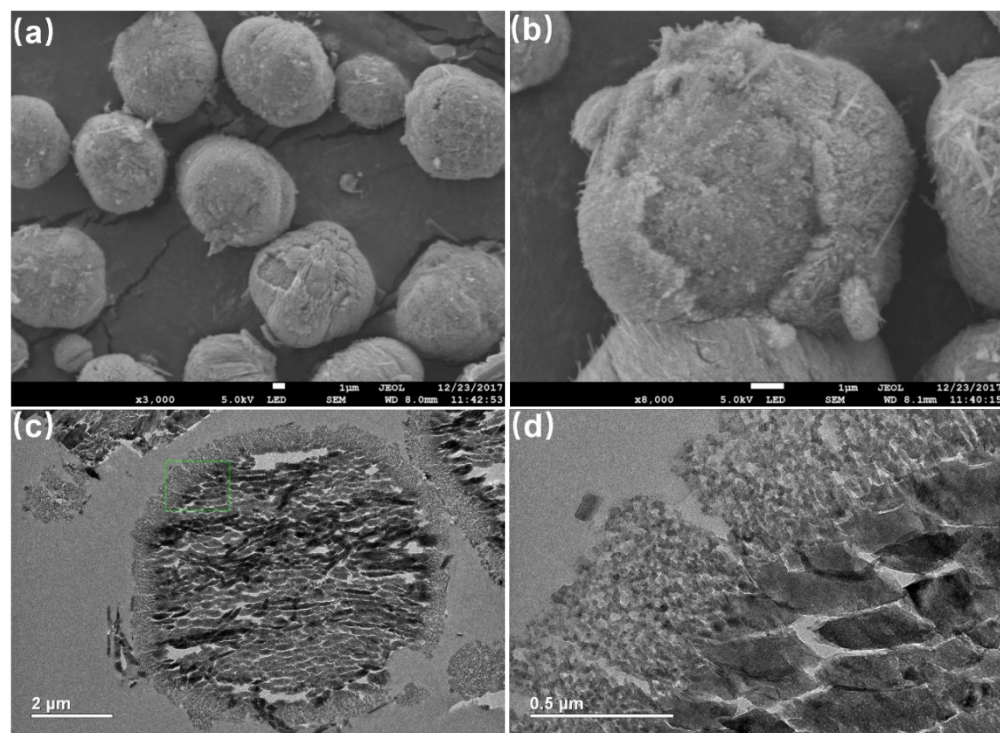

**Figure S7.** (a,b) SEM images, (c) low-resolution TEM images of core-shell dual-structure Z-TPOAC-2 sample, (d) magnified TEM image of marked area in (c) showing the core-shell boundary.



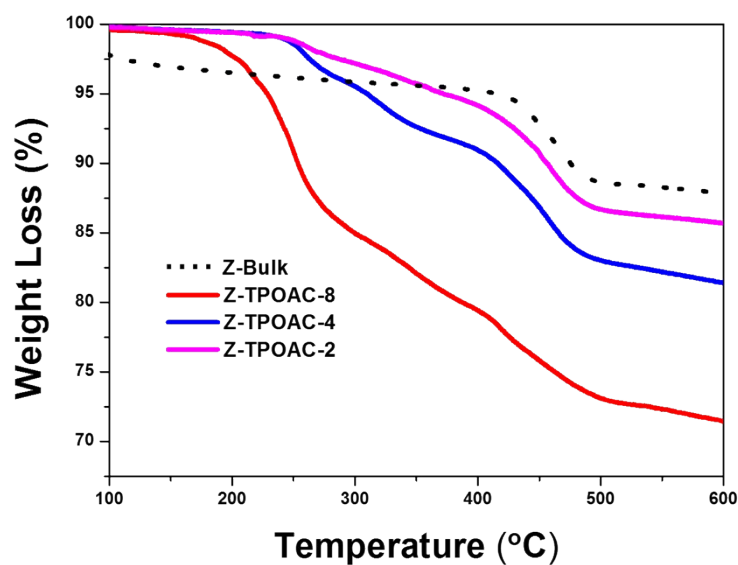

**Figure S8.** TGA curves of different Z-TPOAC-*n* samples (shown as solid lines) in comparison with the TGA curve of as synthesized Z-Bulk sample synthesized only with structure-directing agent TPABr (shown as dashed line). All the samples were dried at 60 °C for more than 12 h before measurement.

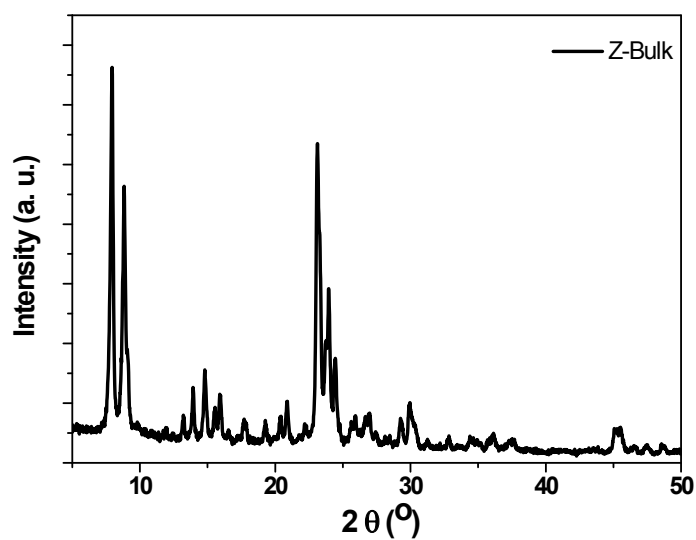

**Figure S9.** Powder XRD patterns of as-synthesized Z-Bulk.

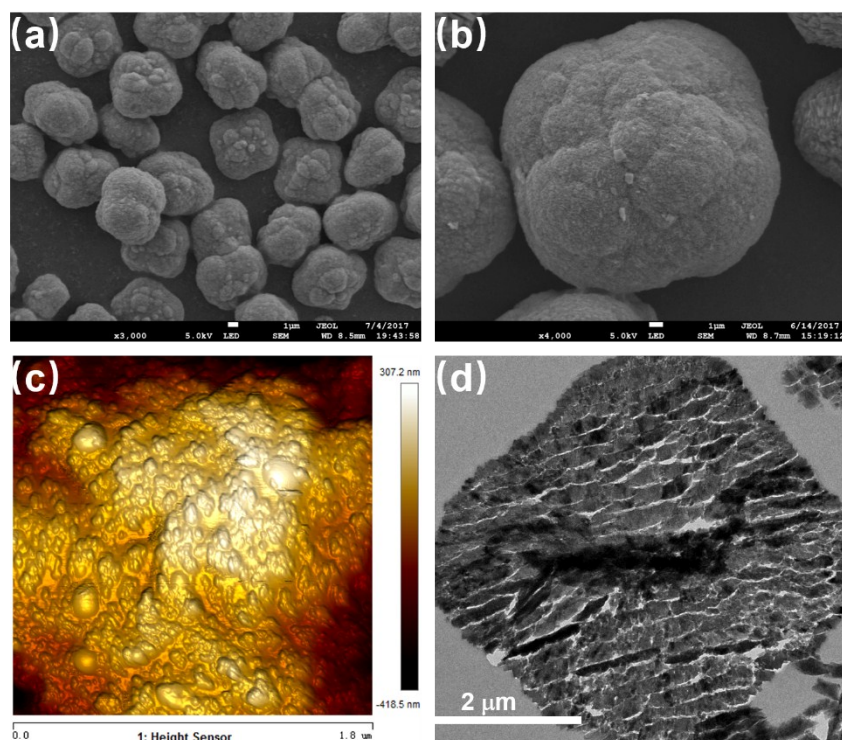

**Figure S10.** (a, b) SEM images, (c) AFM amplitude mode image, (d) Low-resolution cross-sectional TEM image of Z-Bulk sample.

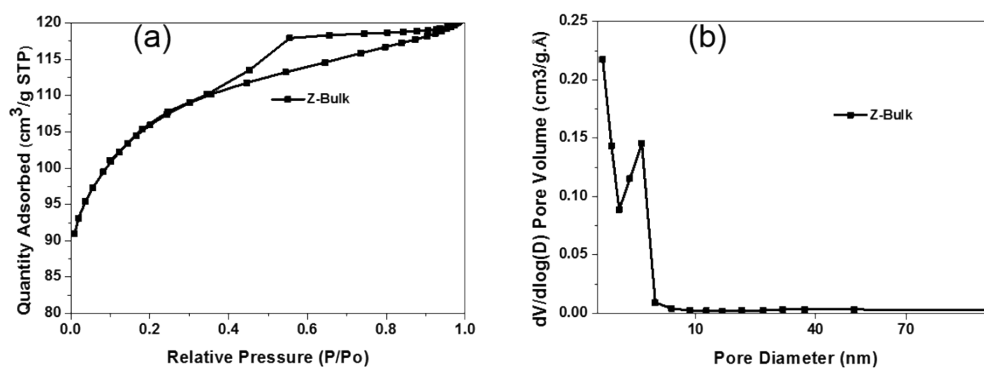

**Figure S11.** (a) N<sub>2</sub> adsorption-desorption isotherms, and (b) BJH mesopore size distribution of as-made Z-Bulk.

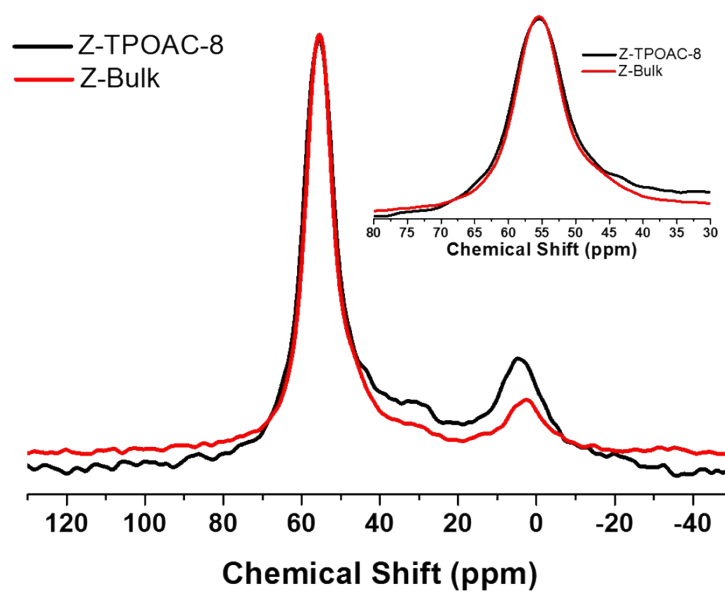

**Figure S12.**  $^{27}\text{Al}$  MAS NMR spectra of mesoporous Z-TPOAC-8 and conventional Z-Bulk samples.

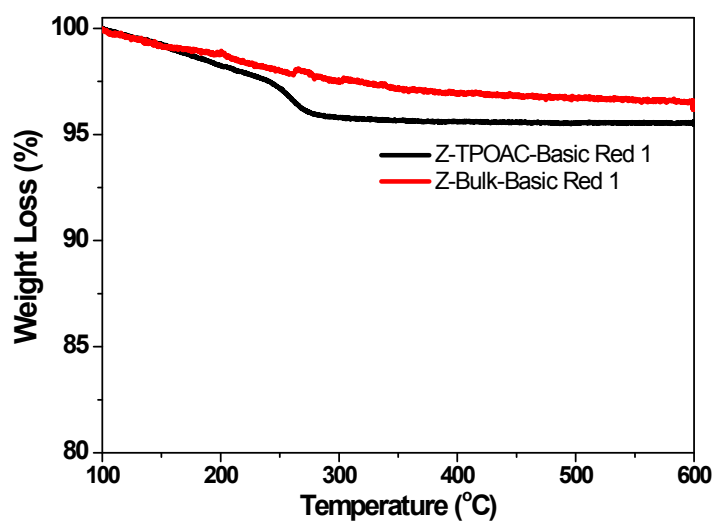

**Figure S13.** Relative weight loss by TGA of as-synthesized Z-Bulk and Z-TPOAC-8 samples after rhodamine 6G Dye adsorption.

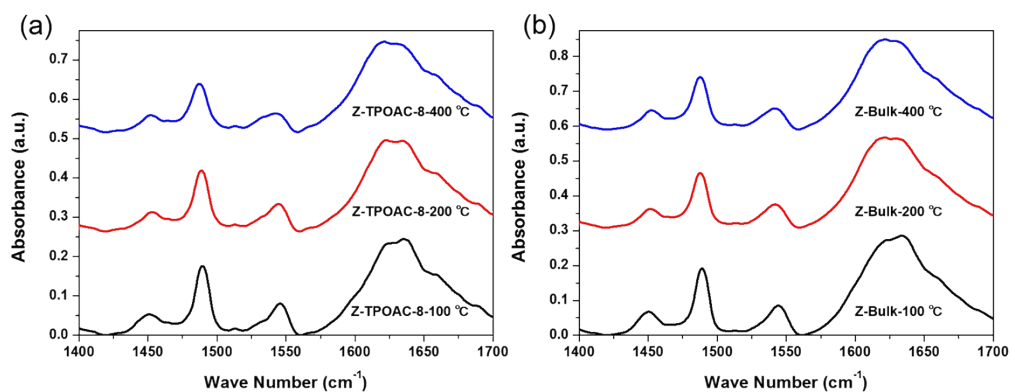

**Figure S14.** Py-FTIR spectra of H<sup>+</sup>-form (a) Z-TPOAC-8 and (b) Z-Bulk samples at different desorption temperature.

**Table S4.** Numbers of Brønsted and Lewis acid sites of H<sup>+</sup>-form Z-TPOAC-8 and Z-Bulk samples calculated from FTIR spectra of pyridine desorption at different temperatures.

| Unit      | 200 °C desorption |         |           |
|-----------|-------------------|---------|-----------|
| mmol/g    | B                 | L       | B/L Ratio |
| Z-TPOAC-8 | 0.09412           | 0.01926 | 4.89      |
| Z-Bulk    | 0.08825           | 0.02508 | 3.52      |

**Table S5.** TOF values in the Suzuki–Miyaura cross coupling reactions

| TOF (h <sup>-1</sup> ) | Cycle 1 | Cycle 2 | Cycle 3 | Cycle 4 |
|------------------------|---------|---------|---------|---------|
| Pd/C                   | 49.3    | 49      | 47.8    | 47.8    |
| Z-Bulk                 | 48.7    | 48.6    | 48.0    | 45.7    |
| Z-TPOAC-8              | 49.1    | 49.0    | 49.3    | 49.3    |

TOF=mol(yield)/mol(M)/t, M=Pd

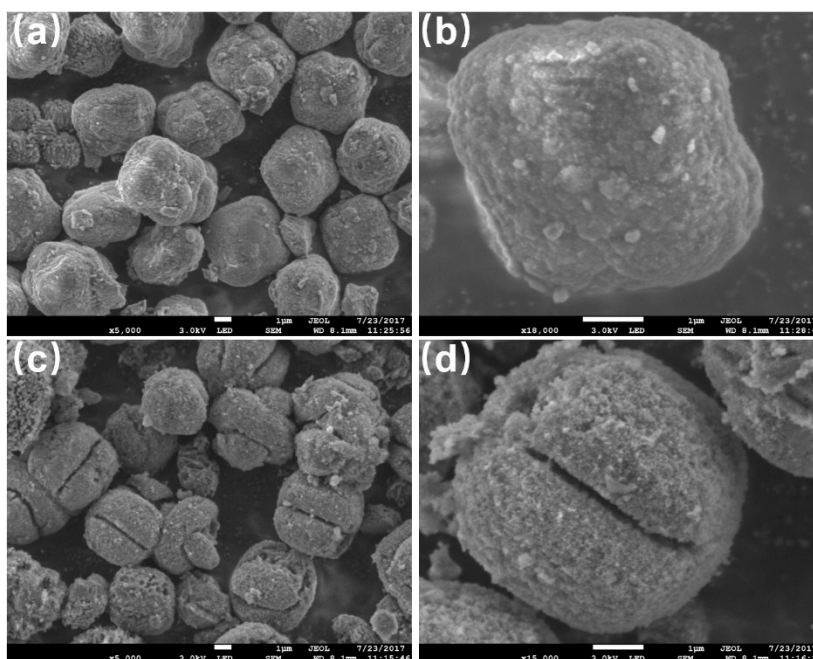

**Figure S15.** SEM images of zeolite samples after four catalytic cycles, (a, b) sample Z-Bulk, (c, d) sample of core-shell dual-structured Z-TPOAC-8 sample.

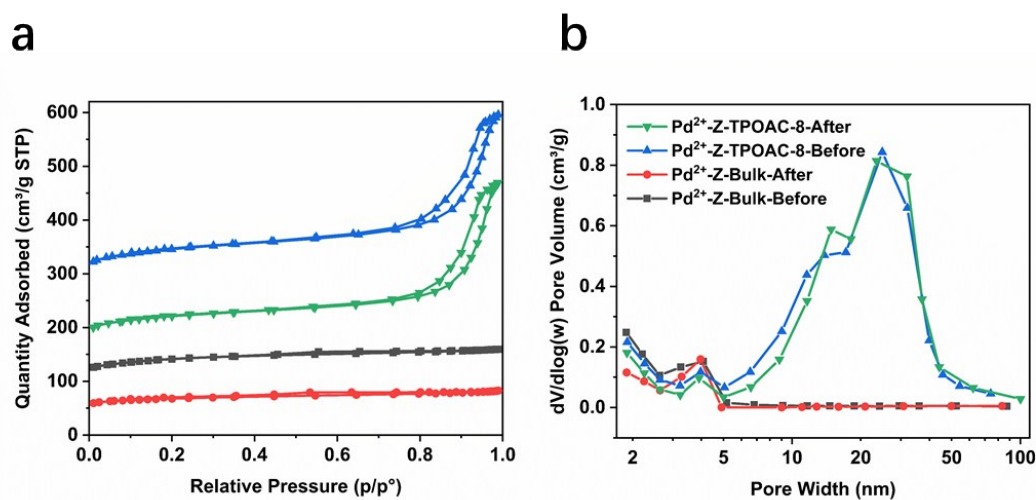

**Figure S16.** (a)  $N_2$  adsorption-desorption isotherms of  $Pd^{2+}$ -exchanged ZSM-5 zeolites before and after the Suzuki–Miyaura cross coupling reactions. The isotherms for  $Pd^{2+}$ -Z-TPOAC-8-before,  $Pd^{2+}$ -Z-TPOAC-8-After, and  $Pd^{2+}$ -Z-Bulk-before were vertically offset by 240, 120, and 40  $cm^3/g$  respectively. (b) BJH mesopore size distribution corresponding to the desorption branch. All samples were degassed at 100  $^{\circ}C$  for 4 h.

**Table S6.** Textural properties of Pd<sup>2+</sup>-exchanged ZSM-5 zeolites before and after the Suzuki–Miyaura cross coupling reactions.

| Sample                             | Surface Area (m <sup>2</sup> / g) |                                 |                               | Pore Volume (cm <sup>3</sup> / g) |                                 |                                |
|------------------------------------|-----------------------------------|---------------------------------|-------------------------------|-----------------------------------|---------------------------------|--------------------------------|
|                                    | S <sub>total</sub> <sup>a</sup>   | S <sub>micro</sub> <sup>b</sup> | S <sub>ext</sub> <sup>c</sup> | V <sub>total</sub> <sup>d</sup>   | V <sub>micro</sub> <sup>e</sup> | V <sub>meso</sub> <sup>f</sup> |
| Pd <sup>2+</sup> -Z-Bulk-Before    | 303                               | 177                             | 127                           | 0.18                              | 0.10                            | 0.08                           |
| Pd <sup>2+</sup> -Z-Bulk-After     | 213                               | 140                             | 61                            | 0.13                              | 0.08                            | 0.05                           |
| Pd <sup>2+</sup> -Z-TPOAC-8-Before | 328                               | 143                             | 186                           | 0.55                              | 0.08                            | 0.47                           |
| Pd <sup>2+</sup> -Z-TPOAC-8-After  | 310                               | 151                             | 159                           | 0.53                              | 0.08                            | 0.45                           |

<sup>a</sup>BET surface area.

<sup>b</sup>t-Plot micropore surface area.

<sup>c</sup>t-Plot external surface area.

<sup>d</sup>Total pore volume of pores calculated at  $P/P_o = 0.98$

<sup>e</sup>t-Plot micropore volume.

<sup>f</sup>V<sub>meso</sub> = V<sub>total</sub>-V<sub>micro</sub>
